LOGO

*Biologia Futura*  
doi:10.1098/not yet assigned

---

# Does offspring sex ratio differ between urban and forest populations of great tits (*Parus major*)?

Nóra Ágh<sup>1\*</sup>, Ivett Pipoly<sup>1</sup>, Krisztián Szabó<sup>2</sup>, Ernő Vincze<sup>1</sup>, Veronika Bókony<sup>3</sup>,  
Gábor Seress<sup>1</sup>, András Liker<sup>1</sup>,

<sup>1</sup>MTA–PE Evolutionary Ecology Research Group, Department of Limnology, University of Pannonia,  
Veszprém, Hungary

<sup>2</sup>Conservation Genetic Research Group, Institute of Biology, University of Veterinary Medicine Budapest,  
Budapest, Hungary

<sup>3</sup>Lendület Evolutionary Ecology Research Group, Plant Protection Institute, Centre for Agricultural Research,  
Budapest, Hungary

**Keywords:** brood sex ratio, urbanization, sexual size dimorphism, sex-dependent mortality,  
tarsus length

---

## 1 Summary

1 Since male and female offspring may have different costs and benefits, parents may use sex ratio adjustment to  
2 increase their fitness under different environmental conditions. Urban habitats provide poorer conditions for  
3 nestling development in many birds. Therefore, we investigated whether great tits (*Parus major*) produce  
4 different brood sex ratios in urban and natural habitats. We determined the sex of nestlings of 126 broods in two  
5 urban and two forest habitats between 2012 and 2014 by molecular sexing. We found that brood sex ratio did  
6 not differ significantly between urban and forest habitats either at egg-laying or near fledging. Male offspring  
7 were larger than females in both habitats. This latter result suggests that male offspring may be more costly to  
8 raise than females, yet our findings suggest that urban great tits do not produce more daughters despite the  
9 unfavourable breeding conditions. This raises the possibility that other aspects of urban life, such as better post-

\*Author for correspondence ([agh.nora@mk.uni-pannon.hu](mailto:agh.nora@mk.uni-pannon.hu)). ORCID: 0000-0001-9184-912X

10 fledging survival, might favour males and thereby compensate for the extra energetic costs of producing male  
11 offspring.

12

### 13 **Introduction**

14 In birds, brood sex ratio is often differ from parity, and the direction and extent of this difference seems to be  
15 not random. Females in many birds species appear to optimize the brood sex ratio according to the cost and  
16 fitness outcome of producing male and female offspring, which may vary among environments as well as with  
17 the quality of the parents (Szász et al. 2012). For example, one sex may have higher growth rate than the other,  
18 resulting in sexual size dimorphism (one sex having larger body size than the other). This can be one of the main  
19 causes of the unequal costs of male and female offspring to parents (e.g. Martins, 2004; Rosivall et al. 2004;  
20 Råberg et al. 2005), as a faster-growing or larger offspring needs larger amounts of food, requiring higher  
21 parental effort (e.g. Anderson et al. 1993; Kalmbach et al. 2001). Sexual size dimorphism is widespread in birds,  
22 both in eggs (e.g. Cordero et al. 2000, 2001) and in nestlings (e.g. larger females: Anderson et al. 1997;  
23 Massemin et al. 2000; larger males: Howe, 1977; Hochachka & Smith, 1991; Badyaev et al. 2001; Tschirren et  
24 al. 2003). Sex differences in offspring survival rate also affect their relative values. For example, different  
25 sensitivity of the sexes to environmental stressors like parasites may induce higher nestling mortality in one sex  
26 compared to the other. The larger sex is more likely to be the more sensitive one, because there may be a trade-  
27 off between growth and immunocompetence, and the larger sex may allocate more resources in the former at  
28 the expense of the latter (e.g. Tschirren et al. 2003 but see Bize et al. 2005). Furthermore, after fledging, the  
29 sexes can greatly differ in their dispersal distance (see examples in Végvári et al. 2018), mortality and lifespan  
30 (e.g. Liker & Székely 2005; Barrett & Richardson, 2011). These components of male and female life history can  
31 be highly dependent on environmental factors (for theoretical model see Julliard, 2000). Accordingly, the  
32 optimal brood sex ratio can differ between different environments. For example, mothers may produce more  
33 offspring of the less vulnerable sex in years or habitats with poor dietary conditions, to optimize their parental  
34 investment and increase the number of surviving offspring (Korpimäki et al. 2000; Pryke & Rollins, 2012). For  
35 instance, Komdeur (1996) found in the Seychelles warbler (*Acrocephalus sechellensis*) that producing more  
36 females (which remain longer in their natal territories than males) on low-quality territories reduces the parents'  
37 future breeding success, whereas on high-quality territories female offspring stay as helpers, increasing their  
38 parents' breeding success. Therefore, parents with high-quality territories are more likely to produce daughters  
39 whereas on low-quality territories they produce more sons.

40 Urban and non-urban habitats often differ in quality and structure, leading to cardinal changes in life  
41 history and breeding phenology of birds in anthropogenic environments (Hinsley et al. 2008; Chamberlain et al.  
42 2009). For instance, urban birds start breeding earlier and have smaller clutches than those in natural habitats  
43 (reviewed in Sepp et al. 2018, examples for great tit: Bailly et al. 2015; Charmantier et al. 2017; Seress et al.  
44 2018). In cities, body condition of fledglings is often lower and their mortality rate is higher, which may be  
45 compensated for by better adult survival (reviewed in Chamberlain et al. 2009; Seress & Liker, 2015; Biard et  
46 al. 2017). Thus, urbanization may change the relative benefits of male and female offspring, resulting in biased  
47 brood sex ratio. In urban environments, reduced availability of natural food sources like arthropods during  
48 brood-rearing (see e.g. Seress et al. 2018) may have a stronger negative effect on the faster-growing and larger  
49 offspring, making the smaller sex more profitable for parents (for similar effects in non-urbanization context,  
50 see Rosivall et al. 2010). Furthermore, competition for arthropod food may continue after fledging and might be  
51 stronger in urban habitats with unfavourable local conditions than in forests, which predicts that parental  
52 investment should be biased towards the more-dispersing sex (Julliard, 2000). Thus, studying offspring sex  
53 ratios may contribute to a better understanding of how animals adapt to urban environments. However, our  
54 knowledge regarding sex ratio adjustment in urban environments is still very limited (e.g. Dhondt 1970, Rejt et  
55 al. 2005, Bonderud et al. 2017).

56 Beside environmental conditions, parental quality is another factor that can influence future reproductive  
57 success of male and female offspring, and thus may also affect the brood sex ratio. On the one hand, the “mate  
58 attractiveness hypothesis” (Burley, 1981, 1986) states that females mating with males with attractive heritable  
59 traits should produce more sons than those who mate with unattractive males, because the formers’ sons will be  
60 more desirable for females and can achieve higher breeding success (e.g. West et al. 2000; Komdeur & Pen,  
61 2002; Yamaguchi et al. 2004; reviewed in Booksmythe et al. 2017). Larger body size (e.g. as indicated by tarsus  
62 length in great tits: Yamaguchi et al. 2004) may be one of these attractive heritable male traits. On the other  
63 hand, parents of larger body size or in better condition may provide higher quality parental care, which can also  
64 influence parents’ decision on optimal sex allocation. This latter idea predicts that higher-quality parents who  
65 can provide adequate care under unfavorable conditions (e.g. can provide more and better prey items to the  
66 nestlings) will produce more offspring of the more vulnerable sex than lower-quality parents. This, again,  
67 predicts an overproduction of the less sensitive sex in urban broods, because body size, condition, and individual  
68 quality is often reduced in urban adults (reviewed in e.g. Seress & Liker, 2015).

69 In this study, we investigated the effects of urbanization on brood sex ratio in great tits, a passerine bird  
70 that occupies a wide range of habitats (Burfield & van Bommel, 2004). Great tits are successful urban colonizers,  
71 but in cities they often show reduced clutch size, lower nestling mass and fledging success compared to forest  
72 areas (Horak, 1993; Chamberlain et al. 2009; Bailly et al. 2015; Seress et al. 2018), likely because of the lower  
73 availability of natural prey as nestling food in urban habitats (Seress et al. 2018). In this species, an earlier study  
74 found signs of facultative sex ratio adjustment, as primary sex ratios varied with date and clutch size (Lessells  
75 et al. 1996). Other studies suggest that different sensitivity of the sexes to habitat quality can also affect the  
76 brood sex ratio in this species. For example, Bouvier et al. (2016) found that the sex ratio of fledglings was more  
77 biased towards females in orchards with high levels of pesticide treatments (hence reduced food availability)  
78 compared to moderately treated or organic gardens. Similarly, breeding territory quality also may predict brood  
79 sex ratio in woodland great tits: Stauss et al. (2005) found that in deciduous forests, where caterpillars (the  
80 preferred nestling food) were abundant, broods were more male-biased than in coniferous forests that had  
81 reduced caterpillar availability. However, none of the earlier studies investigated habitat-related effects on  
82 offspring sex ratios in great tits in an urbanization context. Furthermore, the earlier studies investigated only the  
83 fledgling sex ratio (which can be changed by parental adjustment or sex-dependent mortality) and not the  
84 primary sex ratio (i.e. sex ratio adjustment by parents).

85 In great tits male offspring are larger and may be more sensitive to poor environmental conditions  
86 (Tschirren et al. 2003), whereas females disperse further and thereby may escape more successfully from  
87 unfavourable local conditions (Andreu & Barba, 2006). So based on the aforementioned results, we predicted  
88 that great tits would produce more female-biased broods in the food-limited urban habitats than in natural forests  
89 where nestling food is abundant. We tested this prediction using breeding data from three years of monitoring  
90 four populations, two in cities and two in nearby deciduous woodlands. We investigated both the primary sex  
91 ratio (i.e. sex ratio at egg laying) and fledgling sex ratio, and we took into account other factors that may  
92 influence brood sex ratios, including laying date and, as proxy for parental quality, parental body size (e.g.  
93 Kölliker et al. 1999; Rosivall et al. 2004; Bell et al. 2014). Using data on fledgling body size and nestling  
94 survival, we also evaluated whether male offspring are larger and more sensitive (in terms of nestling mortality)  
95 than females in our populations.

96

## 97 **Materials and Methods**

### 98 **Field methods**

99 We studied great tit populations at two forests and two urban sites in Hungary. Forest sites were located in  
100 deciduous woodlands near Szentgál (47°06'39.75"N, 17°41'17.94"E) and in Vilma-pusztá (47°05'06.7"N,  
101 17°51'51.4"E), whereas the two urban sites were located in the cities of Veszprém (47°05'17.29"N,  
102 17°54'29.66"E) and Balatonfüred (46°57'30.82"N, 17°53'34.47"E). We collected data at all study sites from  
103 2012 to 2014, with the exception of Balatonfüred, where data collection started in 2013. Nest boxes in the urban  
104 habitats were placed mostly in public parks and university campuses; all of these plots were strongly influenced  
105 by anthropogenic disturbance (e.g. presence of vehicle traffic and human activity; see Seress et al 2018 for more  
106 details on the study sites). We monitored the nest boxes at least twice a week from March to early July to record  
107 laying date of the first egg, clutch size, hatching dates, and the number of nestlings (detailed in Seress et al.  
108 2017). We ringed all nestlings just before fledging (at 14-16 days of age, day 1 being the hatching day of the  
109 first-hatching nestlings) and measured the length of their left tarsus to the nearest 0.1 mm and their right wing  
110 (the flattened maximum wing chord, from the carpus to the tip of the longest primary; Svensson, 1992) to the  
111 nearest mm, and recorded their body mass (to the nearest 0.1 g using Pesola spring balance). We also took a  
112 small drop of blood (ca. 25 µl) from the brachial vein. In 2013-2014, we collected unhatched eggs (that did not  
113 hatch for at least 5 days after the first chick of the same brood hatched) and a small tissue sample (e.g. feather,  
114 toes) from chicks found dead in the nest during nest box checking throughout the brood rearing period. We  
115 stored all samples either in Queen's lysis solution or in 96% ethanol at 4°C until further analysis. We captured  
116 adult birds on their nests during brood rearing and ringed each bird with a unique combination of a numbered  
117 metal ring and three plastic colour rings for individual identification (Seress et al. 2017). To increase the number  
118 of individually identified birds in our populations, we also ringed adult great tits outside of the breeding season  
119 (from late September to early February) at the four study sites using mist-nets. Thus, parents of the broods  
120 included in our analyses were identified either by capturing them during brood rearing or by observing their  
121 colour ring combinations from video recordings filmed with concealed nest cameras (see Seress et al. 2017 for  
122 details). On these video samples we considered a colour-ringed individual to be a parent bird if it was recorded  
123 to enter the nest box with food at least once. For measuring and sampling adult birds, we followed the same  
124 protocol described above for fledglings.

125

126 **Laboratory methods**

127 We extracted DNA by using silica membrane isolation kits (GeneJET, Genomic DNA Purification Kit)  
128 following the manufacturers' protocol (Thermo Scientific™). Molecular sexing was performed using the primer  
129 pairs P2 – P8 with the protocol of Griffiths et al. (1998). We investigated all unhatched eggs for the presence of  
130 an embryo before DNA isolation. If we noticed no sign of embryo development (not even a visible germinal  
131 disc), we classified them as infertile eggs. Out of 44 unhatched eggs, we found 30 infertile eggs . We preserved  
132 the embryos from the 14 fertile eggs in 96% ethanol. We then extracted a small sample of tissue from the  
133 embryos and the further DNA isolation steps were similar to the methods we used for blood and other tissue  
134 samples. All embryos were successfully sexed. We were also able to successfully extract DNA from all of the  
135 tissue samples of the dead nestlings.

136 We analysed 126 broods (14 from 2012, 52 from 2013, and 60 from 2014) where we had blood or  
137 other tissue samples from nearly all offspring (i.e. missing tissue sample from no more than 3 dead offspring  
138 per brood). We had 79 broods (6 from 2012, 34 from 2013, and 39 from 2014) where we were able to take DNA  
139 samples from all offspring (both dead and fledged) and thereby we could calculate the primary sex ratio (i.e. at  
140 egg laying). The 6 broods from 2012 that we could include in the primary sex ratio analyses were nests where  
141 all laid eggs had become successful fledglings (i.e. there were no unhatched eggs or dead nestlings). In the  
142 remaining broods we could estimate only the fledgling sex ratio (i.e. at the age of ringing, at 14-16 days). We  
143 aimed to sample both the first and second annual broods at each study site. We categorized each brood as the  
144 first annual breeding attempt of a pair if it was initiated before the date of the first egg laid in the earliest  
145 identified second clutch in that year at that study site (i.e. clutch by a colour-ringed female that had already  
146 successfully fledged at least one young in that year). Broods initiated after this date were categorized as second  
147 annual breeding attempts. Our sample size is inherently unbalanced, because the number of available broods  
148 differed between sites and years, and changed over the season (i.e. there were fewer second broods than first  
149 broods). For the 126 broods, we were able to identify 240 parents, out of which 111 fathers and 118 mothers  
150 were measured as adults (the remaining 11 birds were only measured and ringed as nestlings in the previous  
151 year); in total, we had 105 broods where both parents were identified and measured.

152

### 153 **Statistical analyses**

154 We calculated primary and fledgling sex ratios as number of males divided by the total number of  
155 offspring/nestlings. Primary sex ratio means the sex ratio of all offspring (embryos, dead chicks, and chicks that  
156 reached the fledging age) in complete broods, whereas fledgling sex ratio means the sex ratio of nestlings that

157 reached the fledging age (without embryos or dead chicks). We analysed the data from the first and second  
158 annual broods together and used the laying date as a covariate in all analyses. We calculated laying date in two  
159 alternative ways, and used these two variables in two alternative sets of models. First, we used laying date as  
160 the absolute number of days since 1 January until the laying of the first egg in the brood (Julian day). This  
161 variable reflects brood value, as offspring fledging later in the season have less time for post-fledging growth  
162 before winter. Second, to test the specific effect of timing within the breeding season in each year at each study  
163 site, we used mean-centered laying date, subtracting the mean of the respective site and year from each brood's  
164 laying date. This variable captures a different aspect of the date effect, as the start of the breeding season varies  
165 among sites and years, and the relative timing of broods may affect their food availability (Seress et al. 2018).  
166 In the main text, we present the results using the former date variable; see the Supplementary Material for results  
167 with the latter date variable (Table S3).

168         To test whether the primary and fledgling sex ratios differed between study sites, we built generalized  
169 linear mixed-effects models with binomial error distribution and “logit” link function (function `glmmPQL` in  
170 package `MASS`; Ripley et al. 2013). The full models contained study site, year, laying date (either Julian day or  
171 the mean-centered laying date), tarsus length of the father, and tarsus length of the mother as fixed effects and  
172 brood ID nested in pair ID as random factors. We also tested the interaction between study site and parents'  
173 tarsus length, but it was non-significant in all models ( $P > 0.08$ ), so we present all model results without these  
174 interactions to facilitate easier interpretation of the main effects. Note that we did not include other parental  
175 body size variables (i.e. wing length, body mass) as predictors of brood sex ratio, because these traits can change  
176 considerably throughout the year and in many cases parents' size data were collected outside of their breeding  
177 period (see Field methods above). To increase our sample size, we repeated these analyses after excluding  
178 parents' tarsus length from the model, because we had data on both parents' tarsus length only in a subset of  
179 broods (see Supplementary Table S1 for sample sizes). Henceforward we refer to these analyses as "reduced  
180 models". Furthermore, to assess if our results were affected by imbalanced sample sizes due to the different  
181 frequency of second annual broods at the four sites, we repeated our sex ratio analyses after excluding the second  
182 broods.

183         To statistically compare the sex ratios between the two habitat types (urban sites vs. forest sites) we  
184 calculated linear contrasts from the full and reduced models. These linear contrasts were pre-planned  
185 comparisons between the two urban sites vs. the two forest sites (see also Pipoly et al. 2019 and Vincze et al.



186 2019 for the same approach to compare habitat types by pre-planned linear contrasts and for additional details  
187 of the method). Each linear contrast was back-transformed from the log-scale to provide the odds ratio (OR, i.e.  
188 the proportional difference of the odds of an offspring being male between urban and forest broods) with 95%  
189 confidence interval (CI). For the linear contrasts, we used the “emmeans” function (emmeans package in R;  
190 Lenth & Lenth, 2018).

191 To investigate sexual size dimorphism in fledglings (measured at ringing, 14-16 days post-hatching;  
192 day of hatching = day 1), we used linear mixed-effects models (function lmer in package lme4; Bates et al.  
193 2014). We built three separate models in which the response variables were the wing length, tarsus length or  
194 body mass of individual fledglings, respectively. In these three models the fixed effects were study site, year,  
195 laying date (Julian day only) and sex of the fledgling, while brood ID nested in pair ID and crossed with measurer  
196 ID were included as random factors. To test if body size differences between male and female fledglings were  
197 different at the four study sites, we added the two-way interaction between sex and study site to these models.  
198 Any random variation among broods (including any difference in age) was taken into account by including  
199 brood ID as a random factor. We did not include fledgling age at ringing into the model because it varied in a  
200 very narrow range (14-16 days); note that Seress et al. (2018) found no significant effect of fledgling age (within  
201 the same age interval) on body mass in the same populations between 2013 and 2016.

202 To test for sex-dependent offspring survival, we analysed the effect of offspring sex on the probability  
203 of mortality to fledging. We used a generalized linear mixed-effects model with binomial error distribution and  
204 “logit” link function glmmPQL in package MASS (Ripley et al. 2013). The response variable was the status of  
205 offspring as alive (survived to day 14-16) or dead (unhatched eggs and dead chicks), the fixed effect was the sex  
206 of the offspring, and the model also included brood ID nested within pair ID as random factors. Because  
207 offspring mortality was very rare, especially in forest sites (see Results), we did not investigate whether the sex  
208 difference in mortality differed between habitats.

209 All of the tested variables showed acceptable level of multicollinearity, because the variance inflation  
210 factor (VIF) varied from 1.04 to 1.22 in all of the models. All analyses were done using R version 3.4.2. (R Core  
211 Team 2017).

212

## 213 **Results**

214 In our sample, primary sex ratio was overall 0.493, whereas fledgling sex ratio was 0.514 (for sample sizes see  
215 Table S1). For both primary and fledgling sex ratio, none of the tested predictors had significant effects either



216 in the full model (see model estimates in Table S2 & S3) or in the reduced model (Table 1). Primary sex ratio  
217 was statistically close to parity at every study site (estimated mean  $\pm$  SE, Veszprém city:  $0.55\pm 0.248$ ;  
218 Balatonfüred city:  $0.46\pm 0.390$ ; Vilma-puszta forest:  $0.46\pm 0.256$ ; Szentgál forest:  $0.48\pm 0.246$ ; the 95% CI  
219 includes 0.5 for all sites, see Figure 1) and did not differ significantly between urban and forest sites (Table 1).  
220 Fledgling sex ratio also did not deviate significantly from parity at any of the four sites (Veszprém city:  $0.60$   
221  $\pm 0.171$ ; Balatonfüred city:  $0.51\pm 0.483$ ; Vilma-puszta forest:  $0.51\pm 0.265$ ; Szentgál forest:  $0.52\pm 0.248$ ; the 95%  
222 CI includes 0.5 for all sites, see Figure 2), and there was no significant difference between urban and forest  
223 habitats (Table 2). These results were qualitatively identical when we eliminated the second annual broods from  
224 the models (see model estimates in Table S4 and Table S5).

225 Male fledglings had longer wings and tarsi and were heavier than female fledglings (Figure 3, Table 3).  
226 These size differences between sexes were independent from the study site (interactions between the sex of the  
227 nestlings and study site were non-significant, Table 3). None of the body size parameters varied significantly  
228 with laying date or among years (Table S6).

229 In our sample, 10 males and 4 females from 10 broods died in the egg, and 7 male and 6 female  
230 nestlings from 9 broods died before ringing. The highest number of dead offspring was found in Veszprém ( $n=$   
231 17), whereas at the other sites mortality was very low (Balatonfüred:  $n= 5$ , Szentgál:  $n= 3$ , Vilma-puszta:  $n= 2$ ).  
232 The sex ratio of dead offspring was 0.63 (0.59 in cities and 0.80 in forests); the proportional difference of the  
233 odds of mortality did not differ significantly between males and females (OR= 1.50, CI= 0.91 – 2.47,  $P= 0.411$ ).

234

## 235 Discussion

236 Contrary to our prediction that great tit parents may overproduce daughters in food-limited urban habitats, we  
237 found that neither the primary nor the fledgling sex ratios differed significantly between urban and forest study  
238 sites. We consider these results robust, because we collected data over three breeding seasons at four study sites  
239 (two urban, two forest), and excluding the second annual broods did not change our results qualitatively (Tables  
240 S4 & S5). Our results differ from the findings of two other studies comparing great tits' offspring sex ratios  
241 between habitats of different quality. In one of these earlier studies, where the sexing of nestlings was based on  
242 visual cues (Dhondt 1970), more male offspring were found in urban compared to suburban or woodland habitat  
243 before fledging. In the other study, Bouvier et al. (2016) found more male nestlings in organic orchards with  
244 less pesticide use (that likely represent better habitat quality) than in orchards cultivated by using large amounts

245 of pesticide. The reason for the varying results among these studies is unclear. Notably, the aforementioned  
246 studies showed information only about fledgling sex ratio, so to our knowledge our study is the first that compare  
247 primary sex ratio between urban and forest habitats in great tits.

248         With the available information, we can only speculate why we did not find sex ratio adjustment in  
249 urban habitats. First, it is possible that in our study populations male or female offspring did not differ in the  
250 associated costs of producing and raising them until independence. However, 14-16 days old male fledglings  
251 were significantly heavier (by 3.6%) and had slightly longer tarsi (by 2.5%) and wings (by 2%) compared to  
252 their female siblings, regardless of habitat type. These results suggest that male nestlings require more parental  
253 provisioning during their development than females, although we do not know the extent (and hence the  
254 associated additional costs) of such extra provisioning. Apparently, parents were able to meet this requirement  
255 in both habitats, because the size difference between male and female fledglings was similar in all study sites,  
256 and we did not find any evidence for sex-related mortality. This seems to contradict earlier studies in other great  
257 tit populations, which reported either male-biased sex ratio in unhatched eggs (Cichoń et al. 2005) or higher  
258 mortality in females before fledging (e.g. Smith et al. 1989; Lessells et al. 1996), and in some cases growth of  
259 females was more severely affected by poor condition in tit species (Oddie 2000, Nomi et al. 2018). To better  
260 understand these conflicting results, we need to have more data on the sex-specific mortality rates before and  
261 after hatching from our study populations and also on the environmental factors and parental quality variables  
262 that can influence embryo and nestling survival. For example, it is possible that the increased resource  
263 requirement of male offspring induces male-biased mortality only under unusually poor conditions, such as  
264 harsh weather, high prevalence of parasites or disease, or extremely low food supply (Tschorren et al. 2003).

265         Given that the larger size of male fledglings suggests higher parental cost, a potential explanation for  
266 the lack of sex ratio adjustment is that there may be some unknown cost to producing female offspring that  
267 cancels out the differences in the pay-off between the sexes. For example, it is possible that survival chances are  
268 lower after fledging for females than for males. The most dangerous period in the life of juvenile great tits is the  
269 dispersion after fledging: Naef-Daenzer et al. (2001) found that 47% of the juveniles died during the first 20  
270 days after fledging. Female great tits disperse farther than males (Andreu & Barba, 2006), which may mean  
271 higher risk of mortality for females, especially in urban habitats where the potential breeding and feeding sites  
272 are more fragmented by built-up areas and roads with heavy traffic. Furthermore, survival during autumn and  
273 winter may also differ between the sexes in a habitat-dependent manner. In urban areas, seeds and other food in  
274 artificial feeders can increase the chance of survival (Marzluff, 2017), but competition at these feeders can be

275 stronger than at natural feeding sites such as tree canopies. At these feeders, social rank can limit access to food,  
276 because subordinate individuals may be attacked by dominant ones and therefore get less food. In great tits,  
277 males are more often dominant than females, especially in juveniles (e.g. Barluenga et al. 2000; Dingemanse &  
278 de Goede, 2004). These sex differences in great tit life history may generate female-biased mortality, especially  
279 in urban habitats. However, the only published study that compared the sex-specific survival of great tits in both  
280 urban and rural habitats found higher adult female than male survival in both habitats, and yearling females  
281 outnumbered yearling males in next year in breeding season (Hörak & Lebreton, 1998).

282 We found remarkably high variance of sex ratios among individual broods in both habitat types  
283 (primary sex ratio, range in urban habitat: 0.22 – 0.71, in forest habitat: 0.15 – 0.82; fledgling sex ratio, urban:  
284 0.22 – 1.00, forest: 0.15 – 0.84). This variance in our data was not explained by laying date and the parents’  
285 tarsus length, representing proxies for seasonal environmental changes and for parental quality, respectively.  
286 One interpretation of this high variance is that parents vary in their investment into their offspring’s sex, but  
287 their allocation is determined by factors which we did not investigate. For example, Lessels et al. (1996) reported  
288 that the proportion of male offspring increased with hatching asynchrony in great tits. Furthermore, Pipoly et al.  
289 (2019) found in the same populations and breeding seasons as in the present study that the number of extra-pair  
290 offspring was higher in urban habitats than in forests, which might influence sex ratio adjustment. The other  
291 possible interpretation of our findings is that the observed variance in brood sex ratios is largely random, with  
292 no facultative sex ratio adjustment going on (Ewen et al. 2004). For example, in urban areas, where the  
293 environmental changes may be rapid and unpredictable, sex ratio manipulation might not be a profitable strategy,  
294 as it may be difficult for parents to predict the conditions their offspring will find themselves in. So far, there  
295 have been very few studies on great tit primary sex ratios, and their results provided little if any evidence that  
296 the observed variation among nests is adaptive (Lessels et al. 1996; Kabasakal & Albayrak, 2012).

297

## 298 **Conclusion for Future Biology**

299 Taking our results together with the small number of previous findings, the role of facultative sex ratio  
300 adjustment in birds' adaptation to urban life is not yet clear. Further studies are needed to better understand the  
301 prevalence and drivers of offspring sex ratio in an urbanization context. For example, we should study different  
302 environmental predictors that may differ between antropogenic and natural habitats and may lead to differences  
303 in the costs and benefits of male and female offspring, influencing sex ratio adjustment. Research is needed also

304 on the sex-dependent effects of urbanization on life-history traits and thus the fitness pay-offs of producing sons  
305 and daughters along the urbanization gradient, including sex-related post-fledging survival and future breeding  
306 success of male and female offspring in different habitat types. Furthermore, urbanization may interact with  
307 other anthropogenic influences such as climate change, potentially resulting in complex effects on sex ratios if  
308 males and females differ in their sensitivities to these various perils.

309

### 310 **Acknowledgments**

311 The authors hereby thank all former and current members of the MTA-PE Evolutionary Ecology Research  
312 Group who contributed to the fieldwork producing the data for this study. We are grateful to the members of  
313 Conservation Genetics Research Group of the University of Veterinary Medicine who helped in the laboratory  
314 work.

315

### 316 **Ethical Statement**

317 All applicable international, national and/or institutional guidelines for the care and use of animals were followed. Research  
318 was permitted by the Middle Transdanubian Inspectorate for Environmental Protection, Natural Protection and Water  
319 Management (permission number: 31559/ 2011). All procedures were in accordance with the guidelines for animal care  
320 outlined by ASAB/ABS and Hungarian laws.

321

### 322 **Funding Statement**

323 This work was supported by the Hungarian Scientific Research Fund (NKFIH K84132, 205 K112838).  
324 N. Á. was supported by the Hungarian Ministry of Human Capacities (National Talent Program, grant numbers NTP-  
325 NFTÖ–18-B-0376), G. S. was supported by an NKFIH postdoctoral grant (PD 120998).

326

### 327 **Competing Interests**

328 The authors declare no competing interests.

329

### 330 **Authors' Contributions**

331 IP, EV, VB, GS and AL collected the data in the field. NÁ, IP and KSZ conducted the molecular work. NÁ, IP, EV, VB,  
332 GS and AL participated in conceptualization, design and data analysis. All authors wrote the manuscript.

333

### 334 **References**

- 335 Anderson DJ, Reeve J, Bird D (1997) Sexually dimorphic eggs, nestling growth and sibling competition in American  
336 kestrels *Falco sparverius*. *Funct Ecol* 11, 331–335
- 337 Andreu, J., Barba, E. (2006) Breeding dispersal of Great Tits *Parus major* in a homogeneous habitat: effects of sex, age,  
338 and mating status. *Ardea* 94(1), 45-58
- 339 Badyaev A, Whittingham L, Hill G (2001) The evolution of sexual size dimorphism in the house finch. III. Developmental  
340 basis. *Evolution* 55, 176–189
- 341 Bailly J, Scheifler R, Berthe S, et al (2015) From eggs to fledging: Negative impact of urban habitat on reproduction in two  
342 tit species. *J Ornithol* 157, 377–392. doi: 10.1007/s10336-015-1293-3
- 343 Barluenga, M., Barbosa, A., Moreno, E. (2000) Social relationships due to sex, age and morphology in great tits *Parus*  
344 *major* wintering in a mountainous habitat of Central Spain. *Ardeola* 47, 19-27
- 345 Barrett E, Richardson D (2011) Sex differences in telomeres and lifespan. *Aging Cell* 10, 913–921
- 346 Bates, D., Maechler, M., Bolker, B., Walker, S. (2014) Fitting Linear Mixed-Effects Models Using lme4. *J Stat Soft.*  
347 1406.5823
- 348 Bell, S., Owens, I., Lord, A. (2014) Quality of breeding territory mediates the influence of paternal quality on sex ratio bias  
349 in a free-living bird population. *Behav Ecol* 25(2), 352-358
- 350 Benito MM, González-Solís J (2007) Sex ratio, sex-specific chick mortality and sexual size dimorphism in birds. *J Evol*  
351 *Biol* 20, 1522–1530. doi: 10.1111/j.1420-9101.2007.01327.x
- 352 Biard C, Brischoux F, Meillère A, et al (2017) Growing in cities: an urban penalty for wild birds? A study of phenotypic  
353 differences between urban and rural Great Tit chicks (*Parus major*). *Front Ecol Evol* 5(79) doi: 10.3389/fevo.2017.00079
- 354 Bonderud, E., Otter, K., Murray, B., et al (2017) Effects of parental condition and nesting habitat on sex allocation in the  
355 mountain chickadee. *Behaviour* 154(11), 1101-1121
- 356 Booksmythe I, Mautz B, Davis J, et al (2017) Facultative adjustment of the offspring sex ratio and male attractiveness: a  
357 systematic review and meta-analysis. *Biol Rev Biol Rev* 92, 108–134. doi: 10.1111/brv.12220
- 358 Bouvier, J., Boivin, T., Charmantier, A., et al (2016) More daughters in a less favourable world: Breeding in intensively-  
359 managed orchards affects tertiary sex-ratio in the great tit. *Bas Appl Ecol* 17(7), 638-647
- 360 Burfield IJ, van Bommel F (2004) *Birds in Europe: Population Estimates, Trends and Conservation Status* (Birdlife  
361 Conservation). BirdLife International
- 362 Burley N (1981) Sex ratio manipulation and selection for attractiveness. *Science* 211(4483), 721–722. doi:  
363 10.1126/science.211.4483.721
- 364 Burley N (1986) Sex-ratio manipulation in color-banded populations of Zebra Finches. *Evolution* 40(6), 1191–1206. doi:  
365 10.2307/2408947

- 366 Chamberlain D, Cannon AR, Toms MP, et al (2009) Avian productivity in urban landscapes: A review and meta-analysis.  
367 Ibis 151, 1–18. doi: 10.1111/j.1474-919X.2008.00899.x
- 368 Charmantier A, Demeeyrier V, Lambrechts M, et al (2017) Urbanization is associated with divergence in pace-of-life in  
369 Great Tits. Front Ecol Evol 5. doi: 10.3389/fevo.2017.00053
- 370 Cichon, M., Sendecka J., Gustafsson, L. (2005) Male-biased sex ratio among unhatched eggs in Great Tit *Parus major*, Blue  
371 Tit *P. caeruleus* and Collard Flycatcher *Ficedula albicollis*, J Avi Biol 36(5), 386-390
- 372 Cordero PJ, Griffith SC, Aparicio JM, Parkin DT (2000) Sexual dimorphism in house sparrow eggs. Behav Ecol Sociobiol  
373 48, 353–357. doi: 10.1007/s002650000252
- 374 Cordero PJ, Vinuela J, Aparicio JM, Veiga JP (2001) Seasonal variation in sex ratio and sexual egg dimorphism favouring  
375 daughters in first clutches of the spotless starling. J Evol Biol 14, 829–834
- 376 De Kogel C (1997) Long-term effects of brood size manipulation on morphological development and sex-specific mortality  
377 of offspring. J Anim Ecol 66, 167–178
- 378 Dhondt A.A. (1970) The sex ratio of nestling great tits. Bird Study 17(3), 282-286
- 379 Dingemanse, N., de Goede, P. (2004) The relation between dominance and exploratory behavior is context-dependent in  
380 wild great tits. Behav Ecol 15(6), 1023-1030
- 381 Ewen, J., Cassey, P., Møller, A. P., et al (2004) Facultative primary sex ratio variation: a lack of evidence in birds? Proc  
382 Roy Soc B Biol Sci 271, 1277-1282
- 383 Griffiths, R., Double, M.C., Orr, K., Dawson, R.J.G. (1998) A DNA test to sex most birds. Mol Ecol 7, 1071–1075. doi:  
384 10.1046/j.1365-294x.1998.00389.x
- 385 Hinsley, S., Hill, R., Bellamy, P., et al (2008) Effects of structural and functional habitat gaps on breeding woodland birds:  
386 working harder for less. Landscape Ecol 23, 615–626
- 387 Hochachka, W.M., Smith, J (1991) Determinants and consequences of nestling condition in song sparrows. J Anim Ecol  
388 60, 995–1008
- 389 Horak, P (1993) Low fledging success of urban Great Tits. Ornis Fenn 70, 168–172
- 390 Horak, P., Lebreton, J. (1998) Survival of adult Great Tits *Parus major* in relation to sex and habitat; a comparison of urban  
391 and rural populations. Ibis 140(2), 205-209
- 392 Howe, H. (1977) Sex-ratio adjustment in the common grackle. Science 198, 744–746
- 393 Julliard, R. (2000) Sex-specific dispersal in spatially varying environments leads to habitat-dependent evolutionarily stable  
394 offspring sex ratios. Behav Ecol 11, 421–428
- 395 Kabasakal, B., Albayrak, T. (2012) Offspring sex ratios and breeding success of a population of the Great Tit, *Parus major*.  
396 Zool Mid East 57(1), 27-34. doi: 10.1080/09397140.2012.10648960
- 397 Kalmbach, E., Nager, R., Griffiths, R. et al (2001) Increased reproductive effort results in male-biased offspring sex ratio:  
398 an experimental study in a species with reversed sexual size dimorphism. Proc Roy Soc B Biol Sci 268(1481), 2175-2179

- 399 Komdeur, J. (1996). Facultative sex ratio bias in the offspring of Seychelles warblers. *Proc Roy Soc B Biol Sci* 263, 661-  
400 666
- 401 Komdeur J, Pen I (2002) Adaptive sex allocation in birds: the complexities of linking theory and practice. *Philos Trans R*  
402 *Soc B Biol Sci* 357, 373–380. doi: 10.1098/rstb.2001.0927
- 403 Korpimäki, E., May, C.A., Parkin, D.T., Wetton, J.H., Wiehen, J. (2000) Environmental- and parental condition-related  
404 varia- tion in sex ratio of Kestrel broods. *J. Avian Biol.* 31, 128–134.
- 405 Kölliker, M., Heeb, P., Werner, I., Mateman, A.C., Lessells, C.M., Richner, H. (1999). Offspring sex ratio is related to male  
406 body size in the great tit (*Parus major*). *Behav Ecol* 10, 68-72.
- 407 Lenth, R., Lenth, M. (2018) Package ‘lsmeans.’ *Am Stat* 34, 216–221
- 408 Lessells, C.M., Mateman, A.C., Visser, J. (1996) Great Tit hatchling sex ratios. *J Avian Biol* 27, 135-142. doi:  
409 10.2307/3677142
- 410 Liker, A., Székely, T. (2005) Mortality costs of sexual selection and parental care in natural populations of birds. *Evolution*  
411 59, 890–897. doi: 10.1111/j.0014-3820.2005.tb01762.x
- 412 Martins, T. (2004) Sex-specific growth rates in zebra finch nestlings: a possible mechanism for sex ratio adjustment. *Behav*  
413 *Ecol* 15, 174–180
- 414 Marzluff, J. (2017) A decadal review of urban ornithology and a prospectus for the future. *Ibis* 159, 1-13
- 415 Massemin, S., Korpimäki, E., Wiehn, J. (2000) Reversed sexual size dimorphism in raptors: evaluation of the hypotheses  
416 in kestrels breeding in a temporally changing environment. *Oecologia* 124, 26–32
- 417 Naef-Daenzer, B., Nuber, M., Widmer, F. (2001) Differential post-fledging survival of Great and Coal Tits in relation to  
418 their condition and fledging date. *J Anim Ecol* 70(5), 730-738
- 419 Nomi, D., Yuta, T., Koizumi, I. (2018) Seasonal change in sexual differences in nestling size and survival: a framework to  
420 evaluate sex-dependent environmental sensitivity in the wild. *Avian Res.* 9(1), 10. doi: 10.1186/s40657-018-0102-0
- 421 Oddie, K. (2000) Size matters: competition between male and female great tit offspring. *J Anim Ecol* 69, 903-912
- 422 Pipoly, I., Szabó, K., Bókony, V., et al (2019) Higher frequency of extra-pair offspring in urban than forest broods of great  
423 tits (*Parus major*). *Fron. Ecol Evol* 7, 229. doi: 10.3389/fevo.2019.00229
- 424 Pryke, S., Rollins, L. (2012) Mothers adjust offspring sex to match the quality of the rearing environment. *Proc Roy Soc B*  
425 *Biol Sci* 279(1744), 4051-4057
- 426 R Development Core Team R (2017) A language and environment for statistical computing. R Foundation for Statistical  
427 Computing, Vienna, Austria
- 428 Råberg, L., Stjernman, M., Nilsson, J.Å. (2005) Sex and environmental sensitivity in blue tit nestlings. *Oecologia* 145, 496–  
429 503. doi: 10.1007/s00442-005-0133-1



- 430 Rejt, L., Gryczynska-Siemiatkowska, A., Rutkowski, R., Malewska, A. (2005) Does egg sex ratio in urban kestrels (*Falco*  
431 *tinnunculus*) differ from parity? *Pol J Ecol* 53(4), 545-552
- 432 Ripley, B.D., Venables, W.N., Bates, D.M., et al (2013) Package “MASS.” CRAN Repos.
- 433 Rosivall, B., Szöllösi, E., Hasselquist, D., Török, J. (2010) Males are sensitive — sex-dependent effect of rearing conditions  
434 on nestling growth. *Behav Ecol Sociobiol* 64, 1555–1562. doi: 10.1007/s00265-010-0969-1
- 435 Rosivall, B., Török, J., Hasselquist, D., Bensch, S. (2004) Brood sex ratio adjustment in collared flycatchers (*Ficedula*  
436 *albicollis*): results differ between populations. *Behav Ecol Sociobiol* 56, 346–351
- 437 Sepp, T., McGraw, K.J., Kaasik, A., Giraudeau, M. (2018) A review of urban impacts on avian life-history evolution: Does  
438 city living lead to slower pace of life? *Glob Chang Biol* 24, 1452–1469. doi: 10.1111/gcb.13969
- 439 Seress, G., Hammer, T., Bókony, V., et al (2018) Impact of urbanization on abundance and phenology of caterpillars and  
440 consequences for breeding in an insectivorous bird. *Ecol Appl* 28, 1143–1156. doi: 10.1002/eap.1730
- 441 Seress, G., Liker, A. (2015) Habitat urbanization and its effects on birds. *Acta Zool Acad Sci Hungaricae* 61, 373–408
- 442 Seress, G., Vincze, E., Pipoly, I., et al (2017) Effects of capture and video-recording on the behavior and breeding success  
443 of Great Tits in urban and forest habitats. *J F Ornithol* 88, 299–312
- 444 Smith, H., Kallander, H., Nilsson, J.-A. (1989) The trade-off between offspring number and quality in the great tit *Parus*  
445 *major*. *J Anim Ecol* 58, 383–401. doi: 10.2307/4837
- 446 Stauss, M., Segelbacher, G., Tomiuk, J. et al (2005) Sex ratio of *Parus major* and *P. caeruleus* broods depends on parental  
447 condition and habitat quality. *Oikos* 109(2), 367-373
- 448 Svensson L (1992) Identification Guide to European Passerines, ISBN 9163011182, Stockholm
- 449 Szász, E., Kiss, D., Rosivall, B. (2012) Sex ratio adjustment in birds. *Orn Hun* 20, 26–36. doi: 10.2478/orhu-2013-0002
- 450 Tschirren, B., Fitze, P.S., Richner, H. (2003) Sexual dimorphism in susceptibility to parasites and cell-mediated immunity  
451 in great tit nestlings. *J Anim Ecol* 72, 839–845. doi: 10.1046/j.1365-2656.2003.00755.x
- 452 Végvári, Z., Katona, G., Vági, B., et al (2018) Sex-biased breeding dispersal is predicted by social environment in birds.  
453 *Ecol Evol* 8, 6483–6491. doi: 10.1002/ece3.4095
- 454 Vincze, E., Pipoly, I., Seress, G., et al (2019) Great tits take greater risk toward humans and sparrowhawks in urban habitats  
455 than in forests. *Ethology* 125, 686-701. doi: 10.1111/eth.12922
- 456 West, S.A., Herre, E., Sheldon, B.C. (2000) The benefits of allocating sex. *Science* 290(5490), 288–290. doi:  
457 10.1126/science.290.5490.288
- 458 Yamaguchi, N., Kawano, K.K., Eguchi, K., Yahara, T. (2004) Facultative sex ratio adjustment in response to male tarsus  
459 length in the Varied Tit *Parus varius*. *Ibis* 146, 108–113. doi: 10.1111/j.1474-919X.2004.00220.x
- 460
- 461

462 **Figure and table captions**

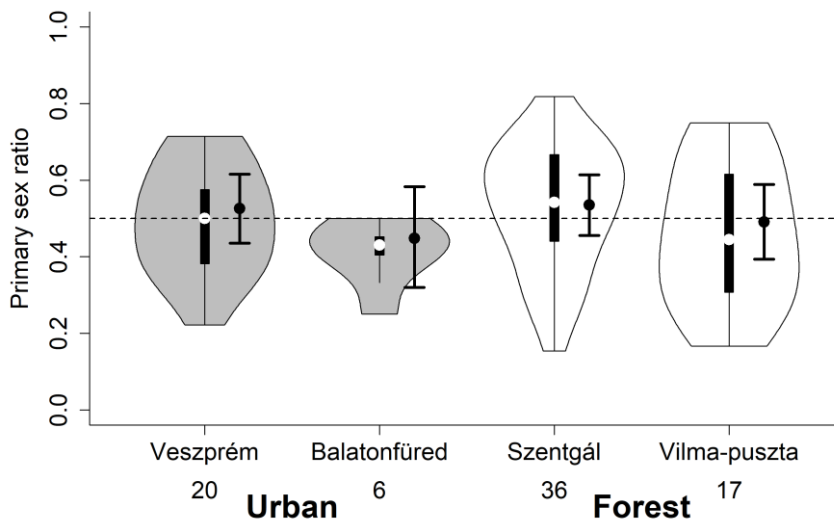

463  
464 **Figure 1: Violin plot of the distribution of primary sex ratio (proportion of males) in broods at urban and forest**  
465 **study sites (first and second annual broods pooled). Each plots show the median (indicated by the small, open**  
466 **circle), the first through the third interquartile range (the thick, solid vertical band), and estimator of the density**  
467 **(thin vertical curves) at each site. Numbers below the violin plots refer to the number of broods in each site. Dots**  
468 **and whiskers next to the inner box plots show means and 95% confidence intervals, respectively, both calculated**  
469 **from the model shown in Table 1.**  
470

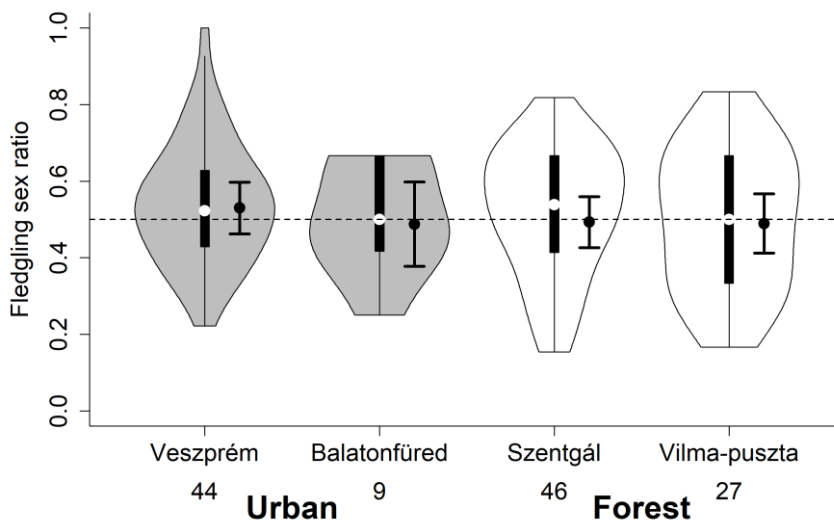

471  
472 **Figure 2: Violin plot of the distribution of fledgling sex ratio (proportion of males) in broods at urban and forest**  
473 **study sites (first and second annual broods pooled). Each plots show the median (indicated by the small, open**  
474 **circle), the first through the third interquartile range (the thick, solid vertical band), and estimator of the density**  
475 **(thin vertical curves) at each site. Numbers below the violin plots refer to the number of broods in each site. Dots**  
476 **and whiskers next to the inner box plots show means and 95% confidence intervals, respectively, both calculated**  
477 **from the model shown in Table 1.**  
478  
479

480

481 **Figure 3: Body size (a: tarsus length, b: wing length, and c: body mass) of male and female fledglings at the study**  
482 **sites. Box plots show the median, lower and upper quartiles and the whiskers represent data within the  $1.5 \times$**   
483 **interquartile range. The error bars show the mean  $\pm$  SE values estimated from the linear mixed models in Table 3.**  
484 **Details on parameter estimates for sex and site effects are provided in Table S6.**

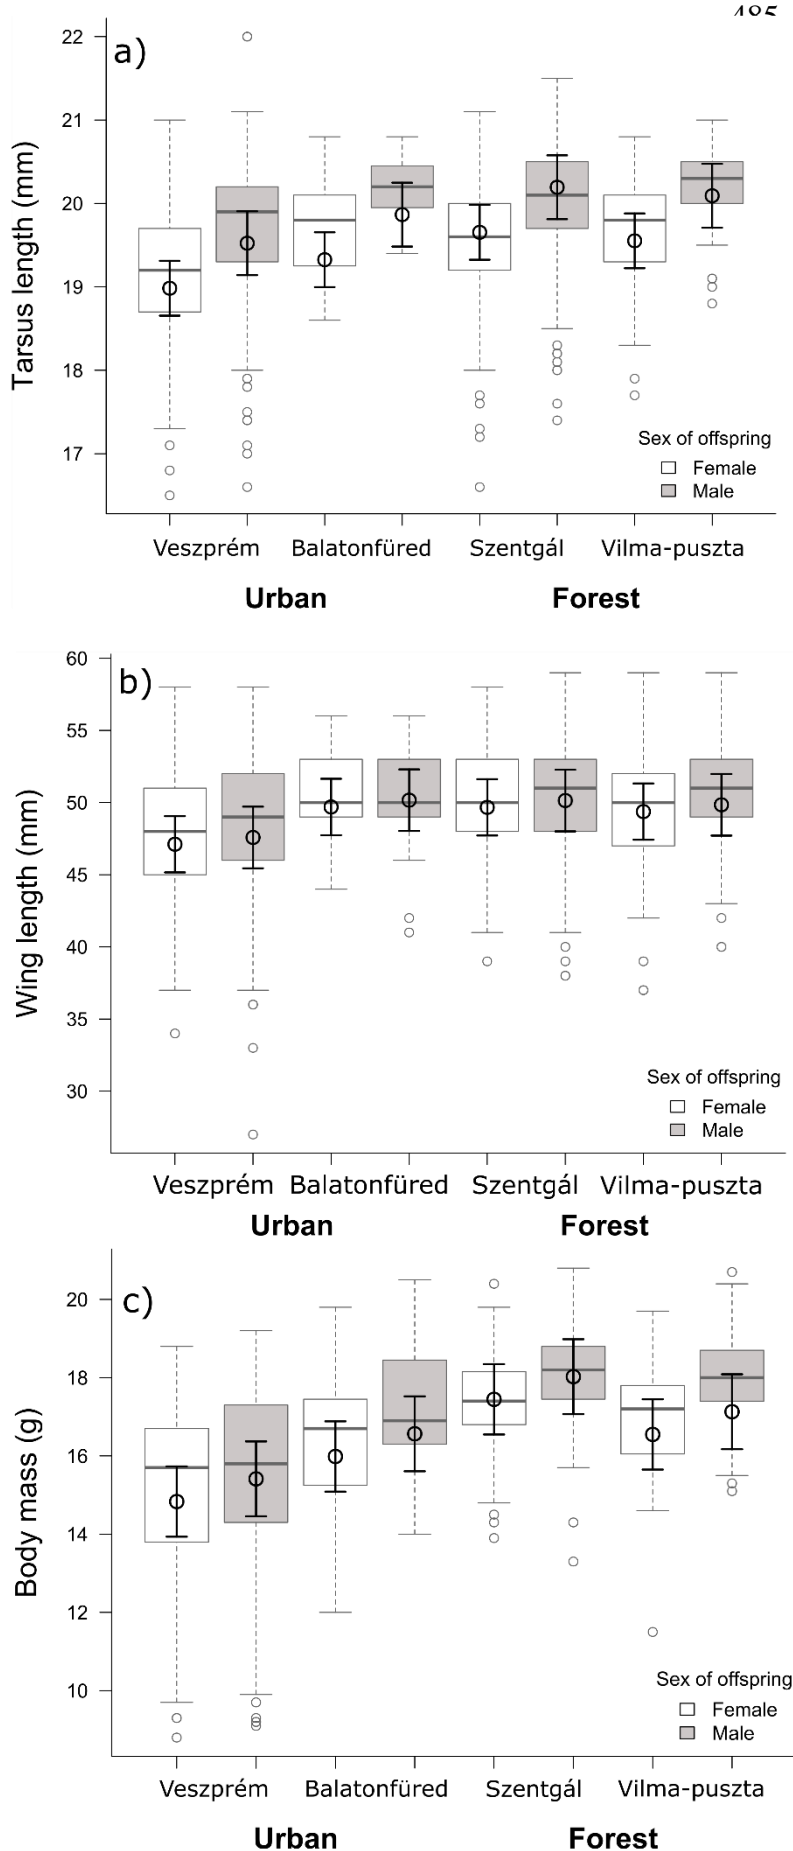

487 **Table 1: Primary and fledgling sex ratio of great tits in relation to study site, year, and laying date (Julian day,**  
 488 **first and second annual broods pooled). Effects are presented as analysis of deviance tables with type-2 sums of**  
 489 **squares for the reduced generalized mixed-effects models; n= 79 and 126 for primary and fledgling sex ratios,**  
 490 **respectively.**

491

|                            | $\chi^2$ | df | <i>P</i> |
|----------------------------|----------|----|----------|
| <b>Primary sex ratio</b>   |          |    |          |
| Sites                      | 2.040    | 3  | 0.564    |
| Years                      | 0.036    | 2  | 0.982    |
| Laying date                | 1.655    | 1  | 0.198    |
| <b>Fledgling sex ratio</b> |          |    |          |
| Sites                      | 1.707    | 3  | 0.635    |
| Years                      | 0.430    | 2  | 0.807    |
| Laying date                | 2.563    | 1  | 0.109    |

492

493 **Table 2: Differences (pre-planned linear contrasts) in primary and fledgling sex ratios between urban and forest**  
 494 **habitats, shown as odds ratio (OR; proportional difference of the odds of an offspring being a male at urban sites**  
 495 **compared to forests).**

|                            | OR [95%CI]       | df  | t      | <i>P</i> |
|----------------------------|------------------|-----|--------|----------|
| <b>Primary sex ratio</b>   |                  |     |        |          |
| Full model                 | 0.87 [0.71;1.06] | 53  | -0.697 | 0.489    |
| Reduced model              | 0.90 [0.75;1.09] | 72  | -0.549 | 0.584    |
| <b>Fledgling sex ratio</b> |                  |     |        |          |
| Full model                 | 1.04 [0.88;1.23] | 96  | 0.236  | 0.814    |
| Reduced model              | 1.07 [0.92;1.25] | 104 | 0.473  | 0.637    |

496

497

498 **Table 3: Results of the analyses of body size parameters of nestlings in relation to their sex, study site, years and**  
499 **laying date. Effects are presented as analysis of deviance tables with type-2 sums of squares for the reduced**  
500 **generalized mixed-effects models. Nestlings of first (n= 952) and second annual broods (n= 200) were pooled in the**  
501 **analyses.**

|                      | Mean squares | df     | F       | P      |
|----------------------|--------------|--------|---------|--------|
| <b>Wing length</b>   |              |        |         |        |
| Sex                  | 35.649       | 1,1032 | 4.023   | 0.045  |
| Site                 | 39.238       | 3,98   | 4.427   | 0.006  |
| Years                | 4.719        | 2,118  | 0.5324  | 0.588  |
| Laying date          | 0.468        | 1,77   | 0.053   | 0.819  |
| Sex × Site           | 12.006       | 3,1035 | 1.355   | 0.255  |
| <b>Tarsus length</b> |              |        |         |        |
| Sex                  | 34.540       | 1,1035 | 148.430 | <0.001 |
| Site                 | 2.105        | 3,115  | 9.046   | <0.001 |
| Years                | 0.244        | 2,129  | 1.049   | 0.353  |
| Laying date          | 0.008        | 1,104  | 0.034   | 0.854  |
| Sex × Site           | 0.230        | 3,1038 | 0.990   | 0.397  |
| <b>Body mass</b>     |              |        |         |        |
| Sex                  | 59.196       | 1,1024 | 66.219  | <0.001 |
| Site                 | 16.296       | 3,101  | 18.229  | <0.001 |
| Years                | 0.891        | 2,122  | 0.996   | 0.372  |
| Laying date          | 0.005        | 1,101  | 0.005   | 0.943  |
| Sex × Site           | 0.801        | 3,1025 | 0.896   | 0.443  |

502

503

504 **Supplementary Material**

505 **Supplementary Table S1: Number of broods and offspring used in different models. Full models include parents'**  
506 **tarsus length as covariate, whereas tarsus length was excluded from reduced models.**

| Sex ratio                                      | Model   | Broods | Offspring |
|------------------------------------------------|---------|--------|-----------|
| <b>First and second annual broods together</b> |         |        |           |
| Primary                                        | Full    | 62     | 622       |
|                                                | Reduced | 79     | 793       |
| Fledgling                                      | Full    | 105    | 943       |
|                                                | Reduced | 126    | 1153      |
| <b>First annual broods only</b>                |         |        |           |
| Primary                                        | Full    | 46     | 498       |
|                                                | Reduced | 59     | 642       |
| Fledgling                                      | Full    | 81     | 772       |
|                                                | Reduced | 98     | 956       |

507

508

509 **Supplementary Table S2: Primary sex ratio (n= 62 broods) and fledgling sex ratio (n= 105 broods) in relation to site,**  
 510 **year, laying date and parents' tarsus length (first and second annual broods pooled). Estimates with SE were**  
 511 **calculated from the parameter estimates of generalized linear mixed-effects models with binomial error distribution**  
 512 **and “logit” link function, with brood ID nested in pair ID as random factors. Year parameters show the difference**  
 513 **from 2012.**

| Model parameters            | Estimate±SE  | t      | P      |
|-----------------------------|--------------|--------|--------|
| <b>Primary sex ratio</b>    |              |        |        |
| site: Veszprém city         | 2.21±3.881   | 0.570  | 0.5713 |
| site: Balatonfüred (city)   | 1.96±0.318   | 0.491  | 0.4321 |
| site: Vilma-puszta (forest) | 2.00±0.264   | 0.504  | 0.4325 |
| site: Szentgál (forest)     | 2.45±0.246   | 0.612  | 0.3328 |
| year: 2013                  | 0.13±0.338   | 0.390  | 0.7103 |
| year: 2014                  | 0.32±0.324   | 0.987  | 0.3795 |
| Laying date (Julian day)    | 0.006±0.005  | 1.229  | 0.2865 |
| Mother's tarsus length      | -0.100±0.144 | -0.701 | 0.4866 |
| Father's tarsus length      | -0.058±0.163 | -0.359 | 0.7378 |
| <b>Fledgling sex ratio</b>  |              |        |        |
| site: Veszprém city         | -0.48±3.243  | -0.148 | 0.8824 |
| site: Balatonfüred (city)   | -0.69±0.257  | -0.209 | 0.8350 |
| site: Vilma-puszta (forest) | -0.70±0.198  | -0.209 | 0.8349 |
| site: Szentgál (forest)     | -0.56±0.190  | -0.167 | 0.8681 |
| year: 2013                  | 0.120±0.234  | 0.513  | 0.6169 |
| year: 2014                  | 0.101±0.222  | 0.455  | 0.6564 |
| Laying date (Julian day)    | 0.004±0.004  | 1.081  | 0.2994 |
| Mother's tarsus length      | -0.041±0.116 | -0.352 | 0.7256 |
| Father's tarsus length      | 0.045±0.128  | 0.352  | 0.7307 |

514

515



516 **Supplementary Table S3: Primary and fledgling sex ratio of great tits in relation to study site, year, and laying**  
517 **date mean-centered for study site and year (first and second annual broods pooled). Effects are presented as**  
518 **analysis of deviance tables with type-2 sums of squares for the reduced generalized mixed-effects models; n= 79**  
519 **and 126 for primary and fledgling sex ratios, respectively.**

|                            | $\chi^2$ | df | <i>P</i> |
|----------------------------|----------|----|----------|
| <b>Primary sex ratio</b>   |          |    |          |
| Sites                      | 3.354    | 3  | 0.340    |
| Years                      | 0.270    | 2  | 0.874    |
| Mean-centered laying date  | 1.583    | 1  | 0.208    |
| <b>Fledgling sex ratio</b> |          |    |          |
| Sites                      | 0.994    | 3  | 0.803    |
| Years                      | 3.591    | 2  | 0.166    |
| Mean-centered laying date  | 2.425    | 1  | 0.119    |

520

521

522 **Supplementary Table S4: Primary sex ratio (n= 59 broods) and fledgling sex ratio (n= 98 broods) in relation to site,**  
523 **year, and laying date (first annual broods only). Estimates with SE were calculated from the parameter estimates of**  
524 **generalized linear mixed-effects models with binomial error distribution and “logit” link function, with brood ID**  
525 **nested in pair ID as random factors. Year parameters show the difference from 2012.**

| Model parameters            | Estimate±SE  | t      | P      |
|-----------------------------|--------------|--------|--------|
| <b>Primary sex ratio</b>    |              |        |        |
| site: Veszprém (city)       | -1.64±2.443  | -0.672 | 0.5042 |
| site: Balatonfüred (city)   | -2.04±2.461  | -0.830 | 0.4104 |
| site: Vilma-puszta (forest) | -1.92±2.569  | -0.749 | 0.4574 |
| site: Szentgál (forest)     | -1.72±2.548  | -0.677 | 0.5014 |
| year: 2013                  | -0.07±0.364  | -0.180 | 0.8582 |
| year: 2014                  | 0.26±0.520   | 0.492  | 0.6249 |
| Laying date (Julian day)    | 0.02±0.024   | 0.682  | 0.4982 |
| <b>Fledgling sex ratio</b>  |              |        |        |
| site: Veszprém city         | -1.75±1.380  | -1.266 | 0.2087 |
| site: Balatonfüred (city)   | -2.01±1.433  | -1.399 | 0.1650 |
| site: Vilma-puszta (forest) | -2.043±1.449 | -1.410 | 0.1619 |
| site: Szentgál (forest)     | -2.08±1.465  | -1.421 | 0.1588 |
| year: 2013                  | -0.06±0.259  | -0.231 | 0.8387 |
| year: 2014                  | 0.225±0.325  | 0.693  | 0.5600 |
| Laying date (Julian day)    | 0.020±0.014  | 1.414  | 0.2929 |

526

527

528 **Supplementary Table S5: Urban-forest differences (linear contrasts) in sex ratio of first annual broods. OR refers**  
529 **to the odds ratio of an offspring being male instead of female at urban sites opposed to forest sites. Full models**  
530 **contain the parents' tarsus length as covariate.**

| Urban vs. forest           | OR [95%CI]       | df | t      | P     |
|----------------------------|------------------|----|--------|-------|
| <b>Primary sex ratio</b>   |                  |    |        |       |
| Full model                 | 0.95 [0.73;1.24] | 37 | -0.178 | 0.860 |
| Reduced model              | 0.98 [0.78;1.24] | 52 | -0.079 | 0.937 |
| <b>Fledgling sex ratio</b> |                  |    |        |       |
| Full model                 | 1.17 [0.97;1.42] | 72 | 0.859  | 0.393 |
| Reduced model              | 1.20 [1.00;1.43] | 90 | 1.055  | 0.294 |

531

532

533 **Table S6: Body size parameters of nestlings in relation to sex, site, year, and laying date (Julian day; first and second**  
 534 **annual broods pooled). Parameter estimates with standard error (SE) are shown from linear mixed-effects models,**  
 535 **with brood ID nested in pair ID and crossed with measurer ID as random factors. Site parameters show the**  
 536 **differences from Veszprém, year parameters show the difference from 2012; the intercept refers to Veszprém 2012.**

| Model parameters            | Estimate±SE  | t      | P      |
|-----------------------------|--------------|--------|--------|
| <b>Wing length (mm)</b>     |              |        |        |
| Intercept                   | 47.11±1.951  | 24.149 | <0.001 |
| sex: male                   | 0.47±0.18    | 2.546  | 0.011  |
| site: Balatonfüred (city)   | 2.58±1.30    | 1.992  | 0.049  |
| site: Vilma-puszta (forest) | 2.27±0.87    | 2.603  | 0.002  |
| site: Szentgál (forest)     | 2.56±0.83    | 3.098  | 0.011  |
| year: 2013                  | 0.44±1.11    | 0.397  | 0.692  |
| year: 2014                  | 0.98±1.08    | 0.910  | 0.365  |
| Laying date (Julian day)    | -0.004±0.017 | -0.259 | 0.796  |
| <b>Tarsus length (mm)</b>   |              |        |        |
| Intercept                   | 19.03±0.327  | 58.224 | <0.001 |
| sex: male                   | 0.47±0.030   | 15.509 | <0.001 |
| site: Balatonfüred (city)   | 0.27±0.210   | 1.307  | 0.194  |
| site: Vilma-puszta (forest) | 0.52±0.139   | 3.731  | <0.001 |
| site: Szentgál (forest)     | 0.61±0.134   | 4.548  | <0.001 |
| year: 2013                  | 0.11±0.178   | 0.627  | 0.532  |
| year: 2014                  | 0.23±0.175   | 1.315  | 0.191  |
| Laying date (Julian day)    | -0.001±0.003 | -0.214 | 0.831  |
| <b>Body mass (g)</b>        |              |        |        |
| Intercept                   | 14.83±0.898  | 16.512 | <0.001 |
| sex: male                   | 0.58±0.059   | 9.856  | <0.001 |
| site: Balatonfüred (city)   | 1.15±0.589   | 1.959  | 0.053  |
| site: Vilma-puszta (forest) | 1.72±0.389   | 4.410  | <0.001 |
| site: Szentgál (forest)     | 2.61±0.370   | 7.064  | <0.001 |
| year: 2013                  | 0.04±0.506   | 0.087  | 0.931  |
| year: 2014                  | 0.47±0.483   | 0.972  | 0.333  |
| Laying date (Julian day)    | -0.001±0.008 | -0.082 | 0.935  |

537
